# Supplementary material for: Extending the utility of [Pd(NHC)(cinnamyl)Cl] precatalysts: Direct arylation of heterocycles
Source: publisher site journal article supplement (doi:10.3762/bjoc.8.187), 2012-09-27

# **Supporting Information**

for

## **Extending the utility of [Pd(NHC)(cinnamyl)Cl] pre-catalysts: Direct arylation of heterocycles**

Anthony R. Martin, Anthony Chartoire, Alexandra M. Z. Slawin and Steven P. Nolan\*

Address: EastCHEM School of Chemistry, University of St Andrews, North Haugh, St Andrews, KY16 9ST, UK

Email: Steven P. Nolan\* - [snolan@st-andrews.ac.uk](mailto:snolan@st-andrews.ac.uk)

\* Corresponding author

**CIF-Check for compound 4**

# checkCIF/PLATON report

Structure factors have been supplied for datablock(s) 4

No syntax errors found.      CIF dictionary      Interpreting this report

## Datablock: 4

---

Bond precision:    C-C = 0.0110 Å                      Wavelength=0.71075

Cell:                a=13.8017(7)                b=17.0279(9)                c=18.9988(14)  
                      alpha=89.971(7)            beta=80.984(7)            gamma=70.150(8)

Temperature:    93 K

|                | Calculated                                     | Reported             |
|----------------|------------------------------------------------|----------------------|
| Volume         | 4141.1(5)                                      | 4141.1(5)            |
| Space group    | P -1                                           | P -1                 |
| Hall group     | -P 1                                           | -P 1                 |
| Moiety formula | 2(C86 H81 Cl N2 Pd), C5<br>H11, C H2 Cl2, C H3 | C89.50 H89 Cl2 N2 Pd |
| Sum formula    | C179 H178 Cl4 N4 Pd2                           | C89.50 H89 Cl2 N2 Pd |
| Mr             | 2739.86                                        | 1370.01              |
| Dx,g cm-3      | 1.099                                          | 1.099                |
| Z              | 1                                              | 2                    |
| Mu (mm-1)      | 0.330                                          | 0.330                |
| F000           | 1440.0                                         | 1440.0               |
| F000'          | 1439.04                                        |                      |
| h,k,lmax       | 16,20,22                                       | 16,20,22             |
| Nref           | 15175                                          | 15028                |
| Tmin,Tmax      | 0.980,0.980                                    | 0.789,1.000          |
| Tmin'          | 0.980                                          |                      |

Correction method= MULTI-SCAN

Data completeness= 0.990                      Theta(max)= 25.350

R(reflections)= 0.0843( 12236)                wR2(reflections)= 0.2577( 15028)

S = 1.043                                      Npar= 880

---

The following ALERTS were generated. Each ALERT has the format  
**test-name\_ALERT\_alert-type\_alert-level.**

Click on the hyperlinks for more details of the test.

---

### Alert level A

PLAT241\_ALERT\_2\_A Check High

Ueq as Compared to Neighbors for

C70

**Author Response: Correct atom identities, established by other chemical means.**

PLAT241\_ALERT\_2\_A Check High      Ueq as Compared to Neighbors for      C71

**Author Response: Correct atom identities, established by other chemical means.**

PLAT241\_ALERT\_2\_A Check High      Ueq as Compared to Neighbors for      C83

**Author Response: Correct atom identities, established by other chemical means.**

PLAT241\_ALERT\_2\_A Check High      Ueq as Compared to Neighbors for      C86

**Author Response: Correct atom identities, established by other chemical means.**

---

 **Alert level B**

|                   |                                                |                                  |                   |     |     |           |
|-------------------|------------------------------------------------|----------------------------------|-------------------|-----|-----|-----------|
| PLAT220_ALERT_2_B | Large Non-Solvent                              | C                                | Ueq(max)/Ueq(min) | ... | 7.2 | Ratio     |
| PLAT230_ALERT_2_B | Hirshfeld Test Diff for                        | C82                              | --                | C83 | ..  | 15.1 su   |
| PLAT230_ALERT_2_B | Hirshfeld Test Diff for                        | C83                              | --                | C84 | ..  | 18.2 su   |
| PLAT232_ALERT_2_B | Hirshfeld Test Diff (M-X)                      | Pd1                              | --                | C83 | ..  | 20.8 su   |
| PLAT234_ALERT_4_B | Large Hirshfeld Difference                     | C86                              | --                | C87 | ..  | 0.26 Ang. |
| PLAT242_ALERT_2_B | Check Low                                      | Ueq as Compared to Neighbors for |                   |     |     | C84       |
| PLAT601_ALERT_2_B | Structure Contains Solvent Accessible VOIDS of |                                  |                   |     |     | 154 A**3  |
| PLAT910_ALERT_3_B | Missing # of FCF Reflections Below Th(Min)     |                                  |                   |     |     | 28        |
| PLAT934_ALERT_3_B | Number of (Iobs-Icalc)/SigmaW .gt. 10 Outliers |                                  |                   |     |     | 5         |

---

 **Alert level C**

RFACR01\_ALERT\_3\_C The value of the weighted R factor is > 0.25  
Weighted R factor given    0.258

|                   |                                                  |                                  |                     |     |    |            |
|-------------------|--------------------------------------------------|----------------------------------|---------------------|-----|----|------------|
| PLAT042_ALERT_1_C | Calc. and Reported MoietyFormula Strings Differ  |                                  |                     |     |    | ?          |
| PLAT045_ALERT_1_C | Calculated and Reported Z Differ by .....        |                                  |                     |     |    | 0.50 Ratio |
| PLAT084_ALERT_2_C | High wR2 Value .....                             |                                  |                     |     |    | 0.26       |
| PLAT094_ALERT_2_C | Ratio of Maximum / Minimum Residual Density .... |                                  |                     |     |    | 2.44       |
| PLAT213_ALERT_2_C | Atom C26                                         | has ADP max/min Ratio .....      |                     |     |    | 3.1 prola  |
| PLAT213_ALERT_2_C | Atom C70                                         | has ADP max/min Ratio .....      |                     |     |    | 3.3 prola  |
| PLAT213_ALERT_2_C | Atom C71                                         | has ADP max/min Ratio .....      |                     |     |    | 3.4 prola  |
| PLAT213_ALERT_2_C | Atom C86                                         | has ADP max/min Ratio .....      |                     |     |    | 4.0 prola  |
| PLAT213_ALERT_2_C | Atom C87                                         | has ADP max/min Ratio .....      |                     |     |    | 3.9 prola  |
| PLAT222_ALERT_3_C | Large Non-Solvent                                | H                                | Uiso(max)/Uiso(min) | ..  |    | 6.7 Ratio  |
| PLAT234_ALERT_4_C | Large Hirshfeld Difference                       | C23                              | --                  | C24 | .. | 0.16 Ang.  |
| PLAT234_ALERT_4_C | Large Hirshfeld Difference                       | C76                              | --                  | C77 | .. | 0.18 Ang.  |
| PLAT241_ALERT_2_C | Check High                                       | Ueq as Compared to Neighbors for |                     |     |    | C22        |

**Author Response: Correct atom identities, established by other chemical means.**

PLAT241\_ALERT\_2\_C Check High      Ueq as Compared to Neighbors for      C77

**Author Response: Correct atom identities, established by other chemical means.**

PLAT241\_ALERT\_2\_C Check High      Ueq as Compared to Neighbors for      C82

**Author Response: Correct atom identities, established by other chemical means.**

PLAT241\_ALERT\_2\_C Check High      Ueq as Compared to Neighbors for      C87

**Author Response: Correct atom identities, established by other chemical means.**

|                                                                    |                                  |            |
|--------------------------------------------------------------------|----------------------------------|------------|
| PLAT242_ALERT_2_C Check Low                                        | Ueq as Compared to Neighbors for | Pd1        |
| PLAT242_ALERT_2_C Check Low                                        | Ueq as Compared to Neighbors for | C66        |
| PLAT242_ALERT_2_C Check Low                                        | Ueq as Compared to Neighbors for | C69        |
| PLAT242_ALERT_2_C Check Low                                        | Ueq as Compared to Neighbors for | C85        |
| PLAT242_ALERT_2_C Check Low                                        | Ueq as Compared to Neighbors for | C89        |
| PLAT334_ALERT_2_C Small Average Benzene                            | C-C Dist. C66 -C71               | 1.37 Ang.  |
| PLAT342_ALERT_3_C Low Bond Precision on                            | C-C Bonds .....                  | 0.0110 Ang |
| PLAT411_ALERT_2_C Short Inter H...H Contact                        | H70 .. H71 ..                    | 2.13 Ang.  |
| PLAT911_ALERT_3_C Missing # FCF Refl Between THmin & STh/L=        | 0.600                            | 89         |
| PLAT912_ALERT_4_C Missing # of FCF Reflections Above STh/L=        | 0.600                            | 33         |
| PLAT913_ALERT_3_C Missing # of Very Strong Reflections in FCF      | ....                             | 1          |
| PLAT918_ALERT_3_C Reflection(s) # with I(obs) much smaller I(calc) |                                  | 10         |
| PLAT939_ALERT_3_C Large Value of Not (SHELXL) Weight Optimized S   |                                  | 12.31      |
| PLAT971_ALERT_2_C Large Calcd. Non-Metal Positive Residual Density |                                  | 2.33 eA-3  |
| PLAT971_ALERT_2_C Large Calcd. Non-Metal Positive Residual Density |                                  | 1.52 eA-3  |

#### ● Alert level G

|                                                                    |               |           |
|--------------------------------------------------------------------|---------------|-----------|
| PLAT005_ALERT_5_G No _iucr_refine_instructions_details in CIF      | ....          | ?         |
| PLAT072_ALERT_2_G SHELXL First Parameter in WGHT Unusually Large.  |               | 0.15      |
| PLAT083_ALERT_2_G SHELXL Second Parameter in WGHT Unusually Large. |               | 8.70      |
| PLAT244_ALERT_4_G Low 'Solvent' Ueq as Compared to Neighbors of    |               | C93       |
| PLAT302_ALERT_4_G Note: Anion/Solvent Disorder .....               |               | 100 Perc. |
| PLAT303_ALERT_2_G Full Occupancy H-Atom H81A with # Connections    |               | 2.00      |
| PLAT303_ALERT_2_G Full Occupancy H-Atom H83 with # Connections     |               | 2.00      |
| PLAT432_ALERT_2_G Short Inter X...Y Contact                        | C91 .. C92 .. | 1.77 Ang. |
| PLAT432_ALERT_2_G Short Inter X...Y Contact                        | C91 .. C93 .. | 2.86 Ang. |
| PLAT773_ALERT_2_G Check long C-C Bond in CIF: C91 -- C92           |               | 1.77 Ang. |
| PLAT790_ALERT_4_G Centre of Gravity not Within Unit Cell: Resd. #  |               | 4         |
|                                                                    | C H3          |           |
| PLAT860_ALERT_3_G Note: Number of Least-Squares Restraints .....   |               | 14        |

- 
- 4 **ALERT level A** = Most likely a serious problem - resolve or explain  
 9 **ALERT level B** = A potentially serious problem, consider carefully  
 32 **ALERT level C** = Check. Ensure it is not caused by an omission or oversight  
 12 **ALERT level G** = General information/check it is not something unexpected
- 2 ALERT type 1 CIF construction/syntax error, inconsistent or missing data  
 37 ALERT type 2 Indicator that the structure model may be wrong or deficient  
 10 ALERT type 3 Indicator that the structure quality may be low  
 7 ALERT type 4 Improvement, methodology, query or suggestion  
 1 ALERT type 5 Informative message, check
-

It is advisable to attempt to resolve as many as possible of the alerts in all categories. Often the minor alerts point to easily fixed oversights, errors and omissions in your CIF or refinement strategy, so attention to these fine details can be worthwhile. In order to resolve some of the more serious problems it may be necessary to carry out additional measurements or structure refinements. However, the purpose of your study may justify the reported deviations and the more serious of these should normally be commented upon in the discussion or experimental section of a paper or in the "special\_details" fields of the CIF. checkCIF was carefully designed to identify outliers and unusual parameters, but every test has its limitations and alerts that are not important in a particular case may appear. Conversely, the absence of alerts does not guarantee there are no aspects of the results needing attention. It is up to the individual to critically assess their own results and, if necessary, seek expert advice.

### **Publication of your CIF in IUCr journals**

A basic structural check has been run on your CIF. These basic checks will be run on all CIFs submitted for publication in IUCr journals (*Acta Crystallographica*, *Journal of Applied Crystallography*, *Journal of Synchrotron Radiation*); however, if you intend to submit to *Acta Crystallographica Section C* or *E*, you should make sure that full publication checks are run on the final version of your CIF prior to submission.

### **Publication of your CIF in other journals**

Please refer to the *Notes for Authors* of the relevant journal for any special instructions relating to CIF submission.

---

**PLATON version of 19/04/2012; check.def file version of 14/04/2012**

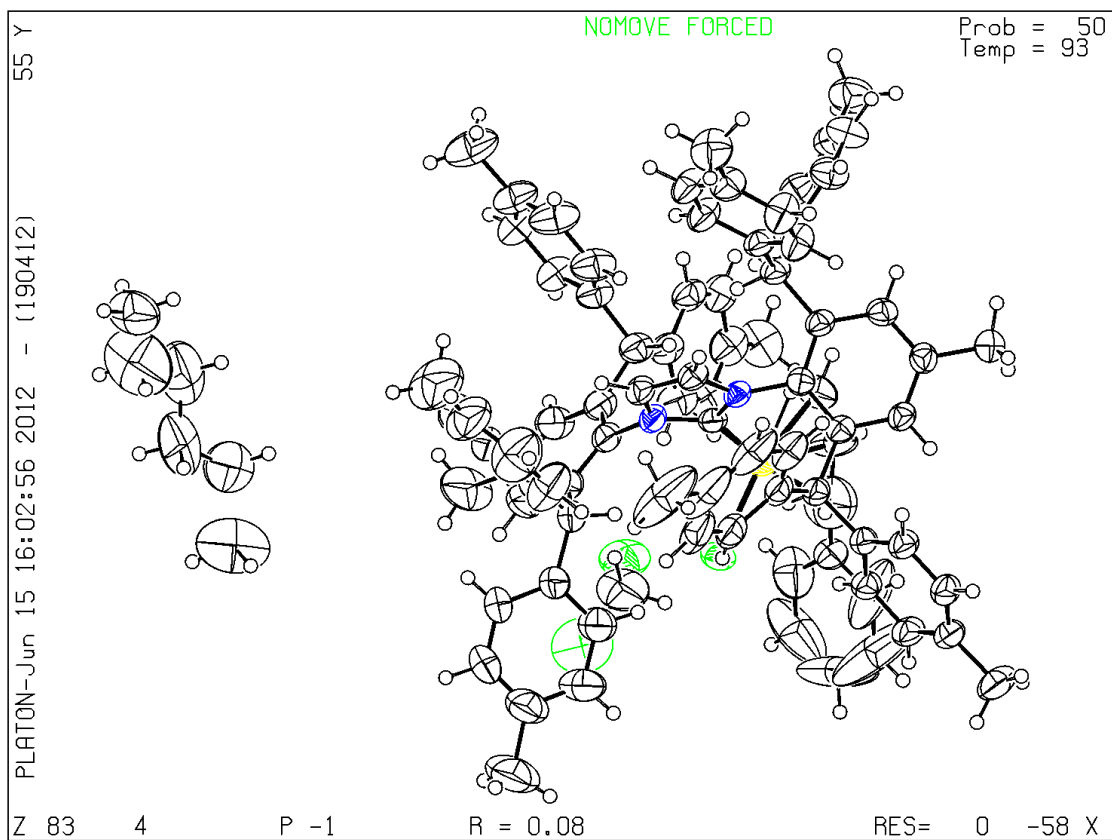

Supplement: Additional file 2 [file 1860-5397-8-187-S2.pdf]
